# Supplementary material for: Compatibility of Nucleobases Containing Pt(II) Complexes with Red Blood Cells for Possible Drug Delivery Applications
Source: MDPI journal article supplement (doi:10.3390/molecules28196760), 2023-09-22
Supplement: s1 [file s1]

## Supporting Information

# Compatibility of Nucleobases Containing Pt(II) Complexes with Red Blood Cells for Possible Drug Delivery Applications

Federica De Castro <sup>1</sup>, Erika Stefàno <sup>1</sup>, Francesco Paolo Fanizzi <sup>1,\*</sup>, Riccardo Di Corato <sup>2,3</sup>, Pasant Abdalla <sup>4</sup>, Francesca Luchetti <sup>4</sup>, Maria Gemma Nasoni <sup>4</sup>, Rosaria Rinaldi <sup>3,5</sup>, Mauro Magnani <sup>4</sup>, Michele Benedetti <sup>1,\*</sup> and Antonella Antonelli <sup>4,\*</sup>

<sup>1</sup> Department of Biological and Environmental Sciences and Technologies, University of Salento, Via Monteroni, 73100 Lecce, Italy; federica.decastro@unisalento.it (F.D.C.); erika.stefano@unisalento.it (E.S.)

<sup>2</sup> Center for Biomolecular Nanotechnologies, Istituto Italiano di Tecnologia, 73010 Arnesano, Italy; riccardo.dicorato@cnr.it

<sup>3</sup> Institute for Microelectronics and Microsystems (IMM), CNR, Via Monteroni, 73100 Lecce, Italy; ross.rinaldi@unisalento.it

<sup>4</sup> Dipartimento di Scienze Biomolecolari, Università degli Studi di Urbino Carlo Bo, Via Saffi 2, 61029 Urbino, Italy; p.abdalla@campus.uniurb.it (P.A.); francesca.luchetti@uniurb.it (F.L.); maria.nasoni@uniurb.it (M.G.N.); mauro.magnani@uniurb.it (M.M.)

<sup>5</sup> Mathematics and Physics "E. De Giorgi" Department, University of Salento, Via Monteroni, 73100 Lecce, Italy

\* Correspondence: fp.fanizzi@unisalento.it (F.P.F.); michele.benedetti@unisalento.it (M.B.); antonella.antonelli@uniurb.it (A.A.)

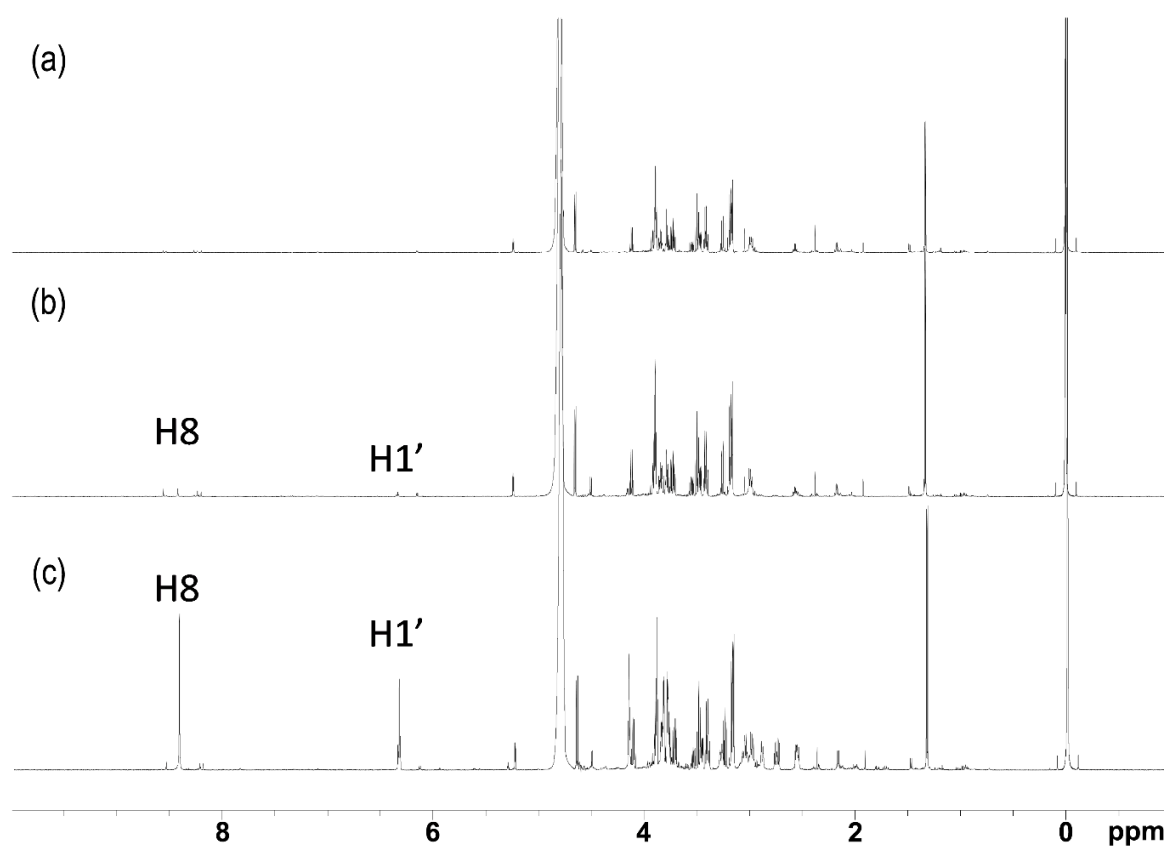

**Figure S1.**  $^1\text{H}$  CPMG NMR spectra of: (a) unloaded Red Blood Cells (RBCs); (b)  $[\text{Pt}(\text{dien})(\text{dGuo})]^{2+}$ -loaded RBCs (**2**, dien = diethylenetriamine; dGuo = 2'-deoxy-guanosine); (c) Addition of complex **2** at known concentration in the corresponding  $[\text{Pt}(\text{dien})(\text{dGuo})]^{2+}$ -loaded RBCs sample.

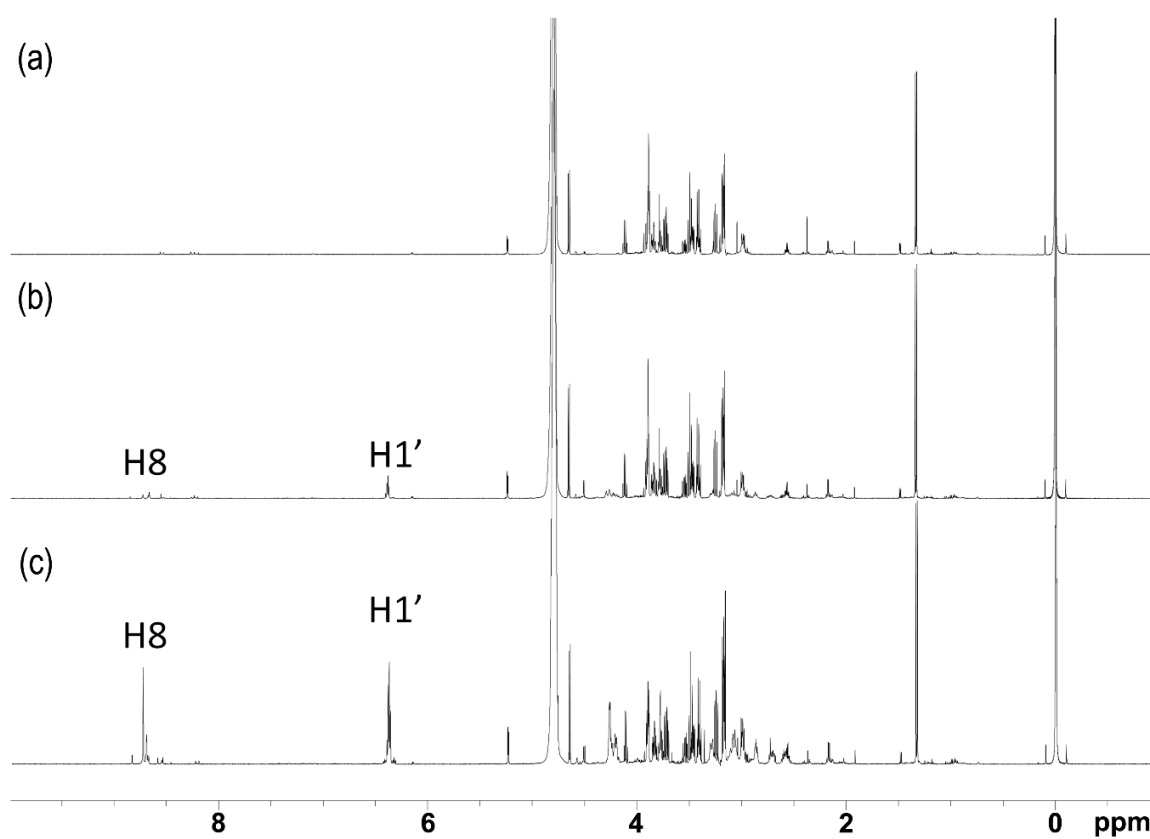

**Figure S2.**  $^1\text{H}$  CPMG NMR spectra of: (a) unloaded Red Blood Cells (RBCs); (b)  $[\text{Pt}(\text{dien})(\text{dGTP})]^{2+}$ -loaded RBCs (**3**, dien = diethylenetriamine; dGTP = 5'-(2'-deoxy)-guanosine-triphosphate); (c) Addition of complex **3** at known concentration in the corresponding  $[\text{Pt}(\text{dien})(\text{dGTP})]^{2+}$ -loaded RBCs sample.

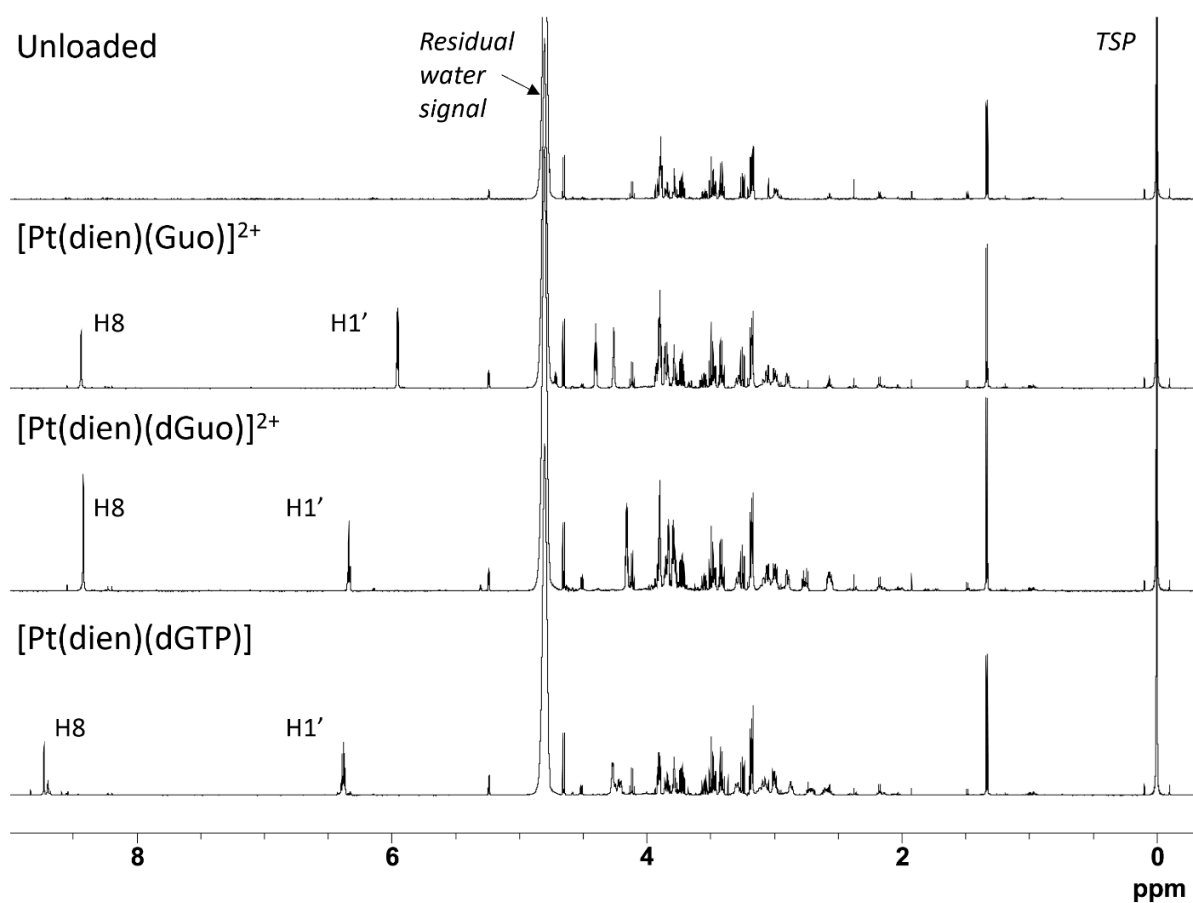

**Figure S3.** <sup>1</sup>H CPMG NMR spectra of unloaded and loaded Red Blood Cells samples after the addition of known concentrations of [Pt(dien)(Guo)]<sup>2+</sup> (1), [Pt(dien)(dGuo)]<sup>2+</sup> (2), and [Pt(dien)(dGTP)] (3) (dien = diethylenetriamine; Guo = guanosine; dGuo = 2'-deoxy-guanosine; dGTP = 5'-(2'-deoxy)-guanosine-triphosphate).

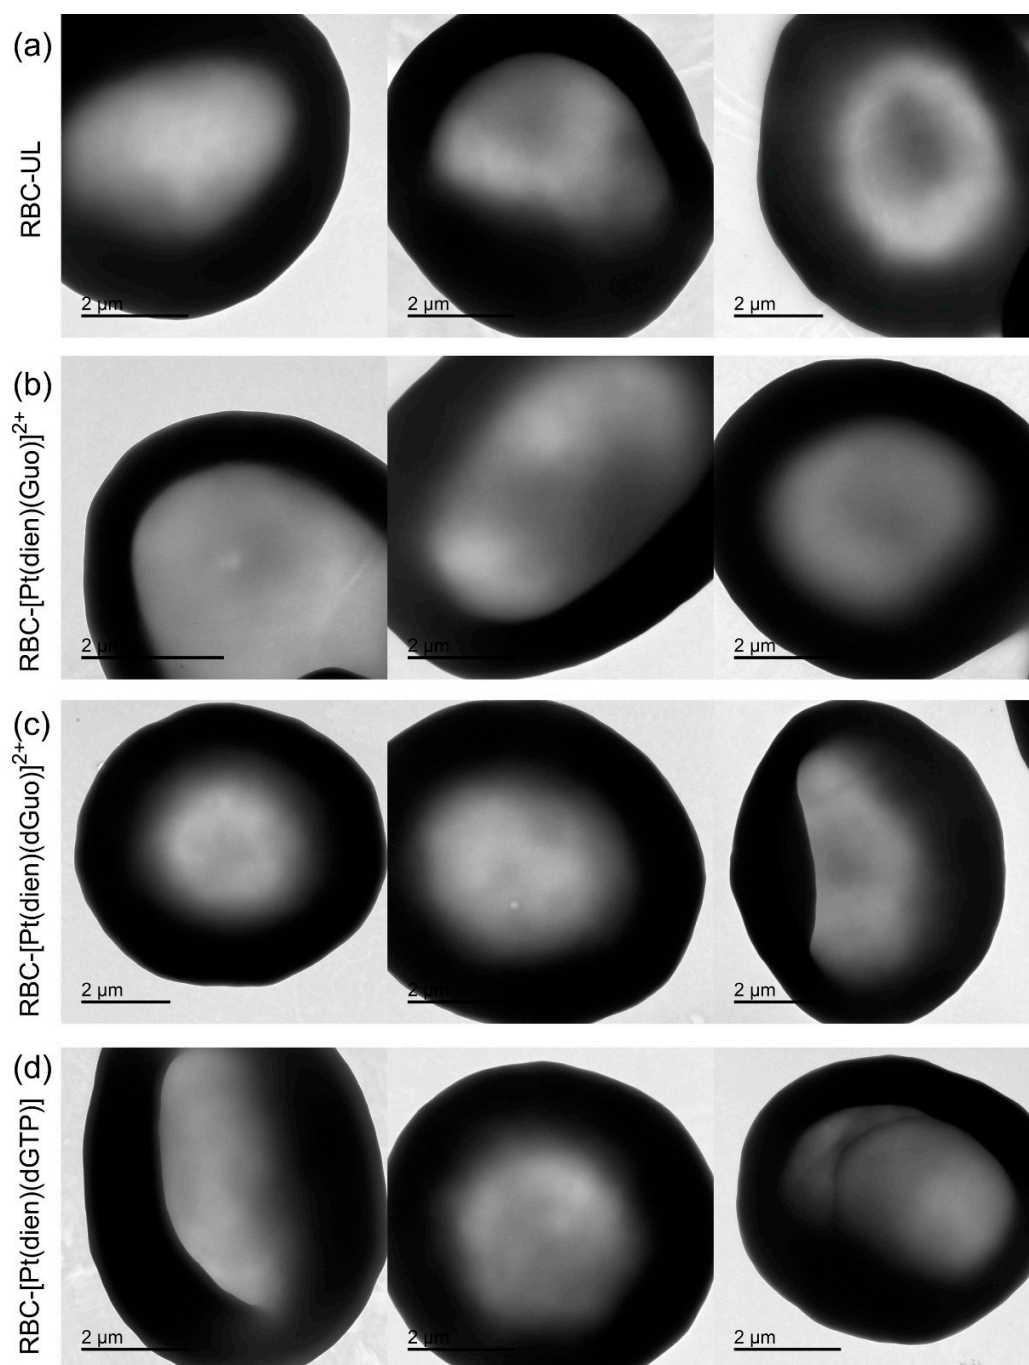

**Figure S4.** Transmission electron microscopy (TEM) analysis of: (a) Unloaded, (b)  $[\text{Pt}^{\text{II}}(\text{dien})(N7\text{-Guo})]^{2+}$ , (c)  $[\text{Pt}^{\text{II}}(\text{dien})(N7\text{-dGuo})]^{2+}$ , and (d)  $[\text{Pt}^{\text{II}}(\text{dien})(N7\text{-dGTP})]$ -loaded Red Blood Cells (dien = diethylenetriamine; Guo = guanosine; dGuo = 2'-deoxy-guanosine; dGTP = 5'-(2'-deoxy)-guanosine-triphosphate; in this figure for complexes **1-3** formulae the indication of platinum oxidation state and bonded *N7* have been omitted for simplicity).

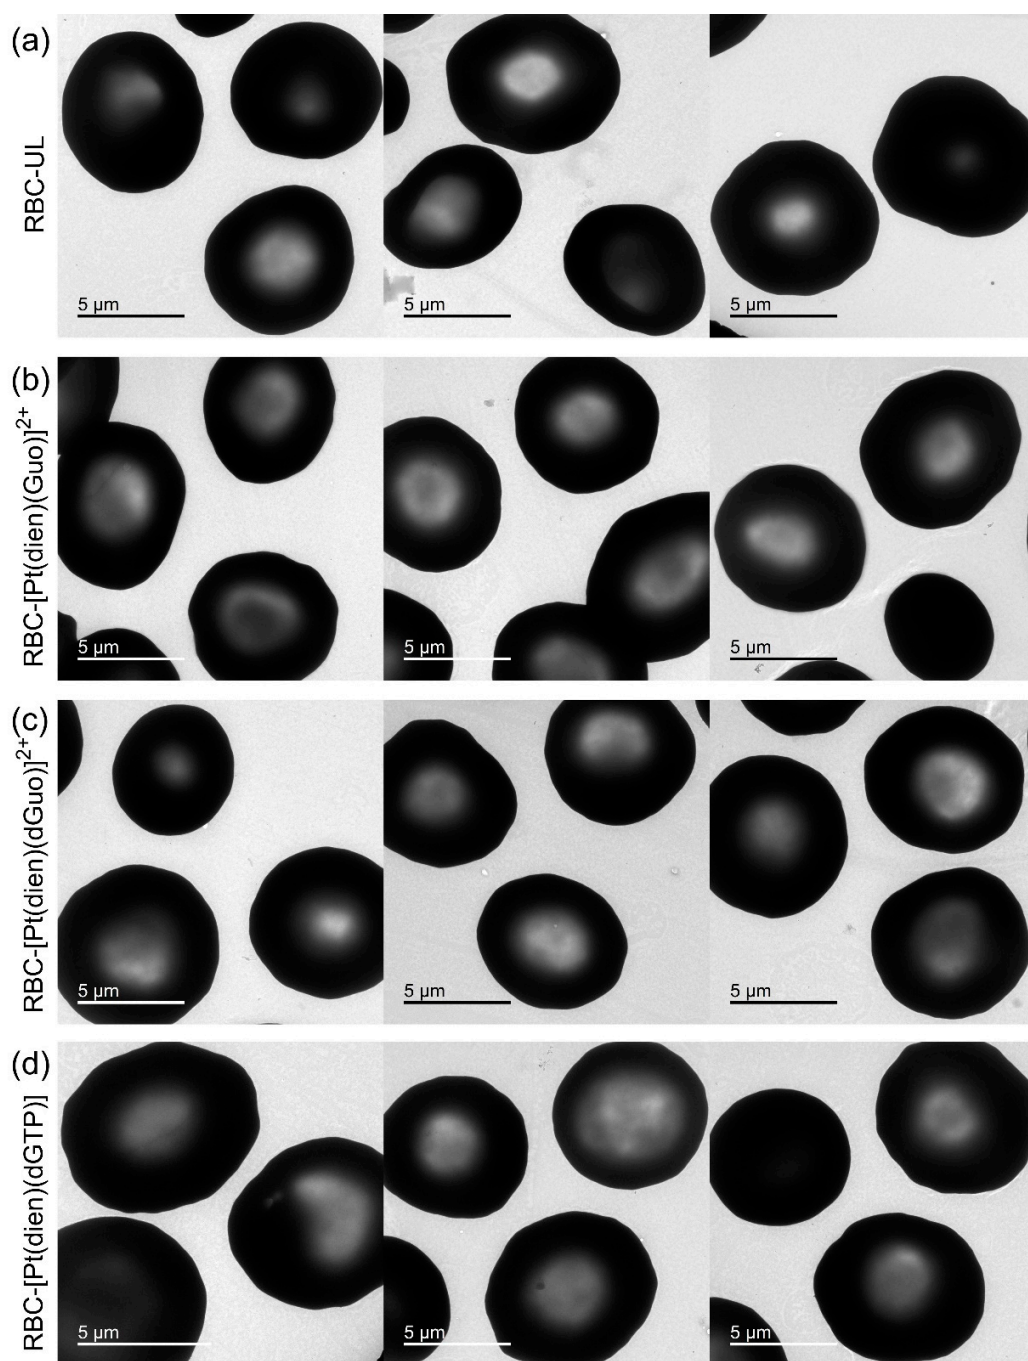

**Figure S5.** Transmission electron microscopy (TEM) analysis of: (a) Unloaded, (b)  $[\text{Pt}^{\text{II}}(\text{dien})(N7\text{-Guo})]^{2+}$ , (c)  $[\text{Pt}^{\text{II}}(\text{dien})(N7\text{-dGuo})]^{2+}$ , and (d)  $[\text{Pt}^{\text{II}}(\text{dien})(N7\text{-dGTP})]^{2+}$ -loaded Red Blood Cells (dien = diethylenetriamine; Guo = guanosine; dGuo = 2'-deoxy-guanosine; dGTP = 5'-(2'-deoxy)-guanosine-triphosphate; in this figure for complexes **1-3** formulae the indication of platinum oxidation state and bonded *N7* have been omitted for simplicity).
